# Supplementary material for: A Divalent Ion Is Crucial in the Structure and Dominant-Negative Function of ID Proteins, a Class of Helix-Loop-Helix Transcription Regulators
Source: PLoS One. 2012 Oct 30;7(10):e48591. doi: 10.1371/journal.pone.0048591 (PMC3484135; doi:10.1371/journal.pone.0048591)
Supplement: Table S1 — A list of the primers used in this study. (XLSX) [file pone.0048591.s004.xlsx]

## Sheet: Sheet1
Primer name	Sequences	Remarks
ID2_(1-82 + 14aa)_PCOLA_F	CACTCAGGGATCCGATGAAAGCCTTCAGTCCCGTG	ID2 Residues 1-82 plus linker into PCOLADUET-1 with BamHI site
ID2_(1-82 + 14aa)_PCOLA_R	AAGTATGCGGCCGCCTATCAGCTAGCGATATCACCACTTTG	ID2 Residues 1-82 plus linker into PCOLADUET-1 with NotI site
E47_HLH_PCOLA_F	CACTCAGCATATGCGGGAGAGGCGCATGGCCAAT	E47 HLH into PCOLADUET-1 with NdeI site
E47_HLH_PCOLA_Strep_R	TTATTAGGTACCTTATTATTTTTCGAACTGCGGGTGGCTCCAAGCGCTCCGCTCTCGCACCTGCTGCTC	E47 HLH into PCOLADUET-1 with C term Strep Tag and KpnI site
E47_HLH_TEV_GW_F	GGGGACAAGTTTGTACAAAAAAGCAGGCTTCGAAAACCTGTATTTTCAGGGCCGGGAGAGGCGCATGGCCAATAACG	E47 HLH into Gateway PDONR vectors
E47_HLH_GW_R	GGGGACCACTTTGTACAAGAAAGCTGGGTTTTATTACCGCTCTCGCACCTGCTG	E47 HLH into Gateway PDONR vectors
ID3_HLH_PCOLA_F	CACTCAGGGATCCGGAGCCGCTGAGCTTGCTGGAC	ID3 HLH into PCOLADUET-1 with BamHI site
ID3_HLH_PCOLA_R	AAGTATGCGGCCGCCTATCACTCGGCCAGGACTACCTGCAG	ID3 HLH into PCOLADUET-1 with NotI site
ID3_Helix1_R	CAGTTCCCGCAGGCGGGAGTA	Results in ID3 Helix 1 when used in conjunction with ID3_HLH_PCOLA_F
ID3_Helix2_F	CAGGTGGAAATCCTACAGCGC	Results in ID3 Helix 2 when used in conjunction with ID3_HLH_PCOLA_R
ID323_LoopBridge	TACTCCCGCCTGCGGGAACTGGTGCCCAGCATCCCCCAGAACAAGAAGGTGAGCCAGGTGGAAATCCTACAGCGC	Results in ID323 into PCOLADUET-1 when used with ID3 Helix 1, Helix 2 and ID3_HLH_PCOLA F and R primers (Red is ID2 specific sequence, Black is ID3 specific sequence)
ID2_HLH_TEV_GW_F	GGGGACAAGTTTGTACAAAAAAGCAGGCTTCGAAAACCTGTATTTTCAGGGCCGGAGCAAAACCCCTGTGGACGAC	ID2 HLH with N terminal TEV cleavage site into Gateway PDONR vectors
ID2_HLH_Linker_GW_R	GGGGACCACTTTGTACAAGAAAGCTGGGTTTTACTAGCTAGCGATATCACCACTTTGTACAAGAAAGCTGGGTTTTAGATGCGAGTCCAGGGCGATCTGCAGGTCCAA	ID2 HLH with C terminal linker into Gateway PDONR vectors
ID2_K47A_F	TGCTACTCCAAGCTCGCGGAGCTGGTGCCCAG
ID2_K47A_R	CTGGGCACCAGCTCCGCGAGCTTGGAGTAGCA
ID2_V50A_F	CTCAAGGAGCTGGCGCCCAGCATCCCC
ID2_V50A_R	GGGGATGCTGGGCGCCAGCTCCTTGAG
ID2_I53A_F	GAGCTGGTGCCCAGCGCCCCCCAGAACAAGAA
ID2_I53A_R	TTCTTGTTCTGGGGGGCGCTGGGCACCAGCTC
ID2_Q55A_F	GTGCCCAGCATCCCCGCGAACAAGAAGGTGAG
ID2_Q55A_R	CTCACCTTCTTGTTCGCGGGGATGCTGGGCAC
ID2_4A_F	GCTACTCCAAGCTCGCGGAGCTGGCGCCCAGCGCCCCCGCGAACAAGAAGGTGA	4A = all 4 amino acids (K47, V50, I53, Q55) are mutated to alanine
ID2_4A_R	TCACCTTCTTGTTCGCGGGGGCGCTGGGCGCCAGCTCCGCGAGCTTGGAGTAGC
ID3_R52A_F	CTACTCCCGCCTGGCGGAACTGGTACCC
ID3_R52A_R	GGGTACCAGTTCCGCCAGGCGGGAGTAG
ID3_V55A_F	TGCGGGAACTGGCACCCGGAGTCCC
ID3_V55A_R	GGGACTCCGGGTGCCAGTTCCCGCA
ID3_V58A_F	TGGTACCCGGAGCCCCGAGAGGCAC
ID3_V58A_R	GTGCCTCTCGGGGCTCCGGGTACCA
ID3_R60A_F	GTACCCGGAGTCCCGGCAGGCACTCAGCTTAG
ID3_R60A_R	CTAAGCTGAGTGCCTGCCGGGACTCCGGGTAC
ID3_4A_F	CCCGCCTGGCGGAACTGGCACCCGGAGCCCCGGCAGGCACTC	4A = all 4 amino acids (R52, V55, V58, R60) are mutated to alanine
ID3_4A_R	GAGTGCCTGCCGGGGCTCCGGGTGCCAGTTCCGCCAGGCGGG
ID2_Y71D_F	CAGCACGTCATCGACGACATCTTGGACCTGC
ID2_Y71D_R	GCAGGTCCAAGATGTCGTCGATGACGTGCTG
ID2_Y71A_F	GCAGCACGTCATCGACGCCATCTTGGACCTGCAG
ID2_Y71A_R	CTGCAGGTCCAAGATGGCGTCGATGACGTGCTGC
ID2_Q76F_F	GACTACATCTTGGACCTGTTCATCGCCCTGGACTCGCAT
ID2_Q76F_R	ATGCGAGTCCAGGGCGATGAACAGGTCCAAGATGTAGTC
ID2_Q76A_F	CTACATCTTGGACCTGGCGATCGCCCTGGACTCG
ID2_Q76A_R	CGAGTCCAGGGCGATCGCCAGGTCCAAGATGTAG
Legend
Bold	Gateway BP attB cloning sites
Italics	TEV protease sites
Underlined	Gene specific sequences
Green	ID2 Linker region (LKPSFLVQSGDIAS)
