# Supplementary material for: A Divalent Ion Is Crucial in the Structure and Dominant-Negative Function of ID Proteins, a Class of Helix-Loop-Helix Transcription Regulators
Source: PLoS One. 2012 Oct 30;7(10):e48591. doi: 10.1371/journal.pone.0048591 (PMC3484135; doi:10.1371/journal.pone.0048591)
Supplement: Table S2 — The crystallographic data collection and refinement statistics of the ID2 homodimer. (XLSX) [file pone.0048591.s005.xlsx]

## Sheet: Sheet1
Table	Crystallographic Data Collection & Refine Statistics
Parameters
Crystal Data		Native		Selenomethionine
Space Group
Unit Cell Dimensions (Å)		P 31 2 1		P 32 2 1
a
b		51.62		51.5
c		51.62		51.5
		111.47		111.72
		α=β=90°, γ=120°		α=β=90°, γ=120°
Diffraction Data
Resolution (Å)		50−2.1(2.18-2.1)		55.86-2.5 (2.64-2.5)
No. of observed reflections		125386		104381
No. of unique reflections		10569		10160
Average Mosaicity		0.53		0.55
Rmerge† (%)		5.8		17.5
aveI/σI		40.6(4.2)		7.8(2.1)
Completeness (%)		100(100)		100(100)
Multiplicity		11.9(10.2)		10.3(10.5)
Phasing Statistics
Ranom†(%)				7.7
Rpim(%)				6.3
Selenium sites				4
Anomalous multiplicity				5.5(5.4)
Anomalous completeness				100(100)
DelAnom correlation between half-sets				0.495
Mid-Slope of Anom Normal Probability				1.139
Refinement
Space Group		P 32 2 1
Resolution (Å)		44.71−2.10
No. of reflections		10026
Rwork/Rfree†(%)		22.5/25.0
No. of atoms
Protein		870
Water		24
Potassium		2
Average isotropic(or equivalent) B factors
Macromolecule		54.4
Solvent		55.3
R.M.S deviations from ideal
Bond angles(°)		1.07
Bond lengths (Å)		0.007
Ramachandran analysis(%)
Favoured		97.09
Allowed		2.91
Outliers		0
	􏰁
† Rmerge = ∑hkl ∑i |Ii(hkl) – [I(hkl)]|/ ∑hkl ∑iIi(hkl), where Ii(hkl)and [I(hkl)]are the intensity of measurement i and the mean intensity for the reflection with indices hkl, respectively.
